# Supplementary material for: Reduced 0.418 V VOC-deficit of 1.73 eV wide-bandgap perovskite solar cells assisted by dual chlorides for efficient all-perovskite tandems
Source: Royal Society of Chemistry journal article supplement (doi:10.1039/d2ee04087e), 2023-01-01
Supplement: d2ee04087e1.pdf [file d2ee04087e1.pdf]

## Supplementary Information

### Reduced 0.418 V $V_{OC}$ -deficit of 1.73 eV wide-bandgap perovskite solar cells assisted by dual chlorides for efficient all-perovskite tandems

Yue Zhao,<sup>‡ab</sup> Changlei Wang,<sup>‡\*ab</sup> Tianshu Ma,<sup>ab</sup> Luwei Zhou,<sup>ab</sup> Zhanghao Wu,<sup>ab</sup> Huayang Wang,<sup>ab</sup> Cong Chen,<sup>c</sup> Zhenhua Yu,<sup>d</sup> Weiwei Sun,<sup>e</sup> Aolin Wang,<sup>f</sup> Hao Huang,<sup>f</sup> Bingsuo Zou,<sup>f</sup> Dewei Zhao<sup>\*c</sup> and Xiaofeng Li<sup>\*ab</sup>

<sup>a</sup> School of Optoelectronic Science and Engineering & Collaborative Innovation Center of Suzhou Nano Science and Technology, Soochow University, Suzhou 215006, China

E-mail: cl.wang@suda.edu.cn, xfli@suda.edu.cn

<sup>b</sup> Key Lab of Advanced Optical Manufacturing Technologies of Jiangsu Province & Key Lab of Modern Optical Technologies of Education Ministry of China, Soochow University, Suzhou 215006, China

<sup>c</sup> College of Materials Science and Engineering, Engineering Research Center of Alternative Energy Materials & Devices, Ministry of Education, Sichuan University, Chengdu 610065, China

E-mail: dewei\_zhao@hotmail.com and dewei.zhao@scu.edu.cn

<sup>d</sup> Key Laboratory of Artificial Micro- and Nano-structures of Ministry of Education of China, School of Physics and Technology, Wuhan University, Wuhan 430072, China

<sup>e</sup> College of Aerospace Science and Engineering, National University of Defense Technology, Changsha 410073, China

<sup>f</sup> Guangxi Key Laboratory of Processing for Non-ferrous Metals and Featured Materials, School of Resources, Environments and Materials, Guangxi University, Nanning 530004, China

<sup>‡</sup> These authors contributed equally.

## Experimental Section

### Materials

Phenmethyllumonium chloride (PMACl, 99.9%), poly [(9,9-bis(3'-(N,N-dimethyl)-N-ethylammoinium-propyl)-2,7-fluorene)-alt-2,7-(9,9-dioctylfluorene)] dibromide (PFNBr, 98%), cesium iodide (CsI, 99.9%), formamidinium bromine (FABr, 99.9%), lead iodide (PbI<sub>2</sub>, 99.9%), lead bromide (PbBr<sub>2</sub>, 99.9%), lead chlorine (PbCl<sub>2</sub>, 99.9%), poly (triarylamine) (PTAA, 99.9%), and ethane-1,2-diamine,dihydroiodide (EDAI<sub>2</sub>, 99.5%) were purchased from Xi'an Polymer Light Technology Corp.. Formamidinium iodide (FAI, 99.9%) was purchased from Greatcell. C<sub>60</sub> was purchased from Nano-C, bathocuproine (BCP) was purchased from Jilin OLED Company (China). Tin floride (SnF<sub>2</sub>, 99%), N,N-dimethylformamide (DMF, anhydrous), dimethyl sulfoxide (DMSO, anhydrous), isopropanol (IPA, anhydrous), diethyl ether (anhydrous), chlorobenzene (CB, anhydrous), lead thiocyanate (Pb(SCN)<sub>2</sub>, 99.5%) and kalium thiocyanate (KSCN, 99.5%) were purchased from Sigma-Aldrich. Poly(3,4-ethylenedioxythiophene): polystyrene sulfonate (PEDOT:PSS, CLEVIOS™ PVP AI 4083) was purchased from Heraeus, LLC. Indium tin oxide (ITO, In<sub>2</sub>O<sub>3</sub>/SnO<sub>2</sub> 90/10 wt%) target, copper (Cu) and silver (Ag) were purchased from Kairui Xincal. All chemicals used in this work are commercially available and are used as received.

### Preparation of wide-*E<sub>g</sub>* perovskite precursors and films

The 1.73 eV FA<sub>0.8</sub>Cs<sub>0.2</sub>Pb(I<sub>0.7</sub>Br<sub>0.3</sub>)<sub>3</sub> perovskite precursor solution was prepared by dissolving 0.5 mmol FAI, 0.2 mmol CsI, 0.3 mmol FABr, 0.7 mmol PbI<sub>2</sub> and 0.3 mmol PbBr<sub>2</sub> in 1 ml mixed solvent of DMF and DMSO with a volume ratio of 3:1. Then 4.85 mg Pb(SCN)<sub>2</sub> and 1 mg KSCN were added into the solution. The perovskite precursor solution was thoroughly mixed and aged for 12 hours before using. PbCl<sub>2</sub> stock solution was prepared by dissolving 0.5 mmol PbCl<sub>2</sub> in 500 μL DMSO. Then, 10 μL PbCl<sub>2</sub> solution was added into 1 mL control perovskite precursor to form the PbCl<sub>2</sub>-based perovskite precursor. PMACl stock solution was prepared by dissolving 0.5 mmol PMACl in 500 μL DMSO, and 10 μL PMACl solution was further added into 1 mL control perovskite precursor solution to form the PMACl-based perovskite solution. For

PbCl<sub>2</sub>+PMACl-based perovskite solution, 0.5 mmol PbCl<sub>2</sub> and 0.5 mmol PMACl were both added into 500  $\mu$ L DMSO, and 10  $\mu$ L of this stock solution was added into 1 mL control perovskite precursor solution to form the PbCl<sub>2</sub>+PMACl co-modified perovskite precursor.

Wide- $E_g$  perovskite film preparation: Wide- $E_g$  perovskite layers with different additives were deposited through a two-step spin-coating process, i.e., 500 rpm for 2 s and 4000 rpm for 60 s, and the antisolvent of 700  $\mu$ L diethyl ether was dripped at 25 s of the second step. The as-deposited film would be annealed at 65 °C for 2 min and then 100 °C for 10 min.

### **Preparation of low- $E_g$ perovskite precursors and films**

Low- $E_g$  (FASnI<sub>3</sub>)<sub>0.6</sub>(MAPbI<sub>3</sub>)<sub>0.4</sub> perovskite precursor: FASnI<sub>3</sub> precursor solution was prepared by dissolving 372 mg SnI<sub>2</sub> and 172 mg FAI with 5 mol% (7.8 mg) SnF<sub>2</sub> in mixed DMF and DMSO solution. MAPbI<sub>3</sub> precursor solution was prepared by dissolving 461 mg PbI<sub>2</sub> and 159 mg MAI with 3.5 mol% (11.3 mg) Pb(SCN)<sub>2</sub> in 565  $\mu$ L DMF and 71  $\mu$ L DMSO mixed solution. (FASnI<sub>3</sub>)<sub>0.6</sub>(MAPbI<sub>3</sub>)<sub>0.4</sub> precursor solution was obtained by mixing stoichiometric amounts of FASnI<sub>3</sub> and MAPbI<sub>3</sub> perovskite precursors. The mixed solution was kept for 30 min before spin coating.

Low- $E_g$  perovskite film: The low- $E_g$  (FASnI<sub>3</sub>)<sub>0.6</sub>(MAPbI<sub>3</sub>)<sub>0.4</sub> precursor was spin-coated on substrates at 4000 rpm for 60 s with 600  $\mu$ L diethyl ether dripped simultaneously during the spinning. The as-deposited film would be annealed at 65 °C for 3 min and then 100 °C for 7 min.

### **Fabrication of single-junction PSCs and all-perovskite TSCs**

Wide- $E_g$  PSCs: The pre-patterned ITO substrates were cleaned through sonication in deionized water and ethanol sequentially, and then cleaned by UV/Ozone treatment (Jelight Company Inc.) for 20 min before using. PTAA dissolved in CB (4 mg/mL) was spin-coated onto the ITO substrates at 5000 rpm for 30 s and then dried at 100°C for 10 min, followed by being coated with an ultrathin layer of PFNBr. Wide- $E_g$  perovskite layers were then quickly spin-coated on the PTAA layer with different precursors as

described above through a two-step process, i.e., 500 rpm for 2 s and 4000 rpm for 60 s, and the antisolvent of 700  $\mu\text{L}$  diethyl ether was dripped at 25 s of the second step. Then, the samples were transferred into a vacuum chamber for the thermal evaporation of functional layers.  $\text{C}_{60}$  (20 nm)/BCP (5 nm)/Cu (100 nm) were sequentially deposited on the perovskite film to complete the solar cell fabrication.

**Low- $E_g$  PSCs:** Sonication-cleaned ITO substrates were treated under UV-ozone for 20 min, and then 20 nm PEDOT:PSS layer was spin-coated on ITO, followed by being annealed at 150  $^{\circ}\text{C}$  for 20 min in ambient air. The substrates were then transferred into a  $\text{N}_2$ -filled glovebox for the deposition of perovskite films.  $(\text{FASnI}_3)_{0.6}(\text{MAPbI}_3)_{0.4}$  perovskite precursors were spin-coated on the PEDOT:PSS layer at 1000 rpm for 10 s and 4000 rpm for 60 s. During the spin-coating, 600  $\mu\text{L}$  diethyl ether was dropped on the film. The perovskite film was annealed as the same way mentioned above. After the deposition of perovskite layer, the samples were then put into a high vacuum chamber for the following deposition of functional layers. 20 nm  $\text{C}_{60}$  and 5 nm BCP were sequentially evaporated onto the perovskite. 100 nm Cu was finally deposited with an active area of 0.09  $\text{cm}^2$ . At last, the devices were encapsulated with cover glass and UV-curable epoxy.

For 2T all-perovskite TSCs, the device structure is ITO/PTAA/PFNBr/wide- $E_g$  perovskite/ $\text{C}_{60}$ / $\text{SnO}_2$ /ITO/PEDOT:PSS/low- $E_g$  perovskite/ $\text{C}_{60}$ /BCP/Cu. The wide- $E_g$  perovskite top subcell was fabricated using the same method as mentioned above. The interconnecting layer is  $\text{SnO}_2$ /ITO, where 20 nm  $\text{SnO}_2$  was formed using atomic layer deposition (ALD) at 70  $^{\circ}\text{C}$ , and the 100 nm ITO layer was deposited by magnetron sputtering at 60 W for 20 min. Following deposition of low- $E_g$  bottom subcell used the same method as described above. At last, the devices were encapsulated with cover glass and UV-curable epoxy.

### **Film and device characterization**

The microscopic morphologies were characterized by a field emission scanning electron microscope (SEM, ZEISS, Sigma 300). The optical properties, including absorbance, transmittance and reflectance spectra, were all measured by an UV-vis-

NIR spectrometer (PekinElmer, Lambda 1050 S+). The XRD patterns were obtained by using a Bruker D8 advance diffractometer. XPS was performed using a micro-focus monochromatic Al K $\alpha$ -ray source (Thermo Scientific Escalab 250Xi US), which corresponded to the instrument resolution of 0.45 eV that was determined by the Ag 3d<sub>5/2</sub> peak. PL and TRPL measurements were performed on perovskite films directly deposited on glasses using flashing light system (FLS980, Edinburgh Inc.). ToF-SIMS measurements were performed on a ToF-SIMS.5 instrument from IONTOF, Germany, operated in spectral mode using a 30 keV Bi<sup>3+</sup> primary ion beam. For depth profiling, a 1000 eV O<sup>2+</sup> sputter beam was used to remove the material layer-by-layer in interlaced mode from a raster area of 300×300  $\mu\text{m}^2$ . Negative ions were collected for depth profile analysis. The mass-spectrometry was performed on an area of 115×115  $\mu\text{m}^2$  in the center of the sputter crater.

*J-V* curves were measured in air under 100 mW/cm<sup>2</sup> AM 1.5G solar irradiation (SS-F5-3A, Enlitech) with a Keithley 2400 sourcemeter. The light intensity for *J-V* measurements was calibrated by a standard Si solar cell. The steady-state power outputs of PSCs and TSCs were obtained by tracking the maximum power point under constant illumination (100 mW/cm<sup>2</sup>) with a LED source, and the devices were kept in inert condition without encapsulation and temperature control units. The dark current was recorded with a semiconductor parameter analyzer (Agilent, B1500A). EQE spectra were performed from 300 nm to 1100 nm on a QE system (QE-R, Enlitech). For the EQE measurements of TSCs, a white light was used as the external light source with the 550 and 850 nm filters for bottom and top subcells, respectively. SCLC measurements were conducted by using a semiconductor parameter analyzer (Agilent, B1500A) with the voltage swept from -0.1 V to 3 V. For EIS characterizations and C-V measurements, an electrochemical workstation (CIMPS, Zennium Zahner) was used under dark condition.

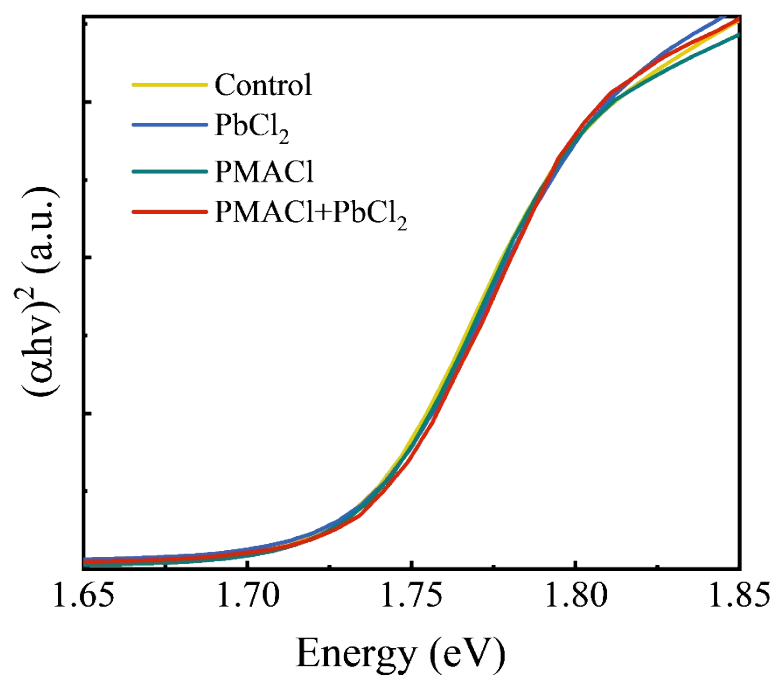

**Fig. S1** Tauc plots of wide- $E_g$  perovskite films with different additives (control,  $\text{PbCl}_2$ ,  $\text{PMACl}$ , and  $\text{PbCl}_2+\text{PMACl}$ ).

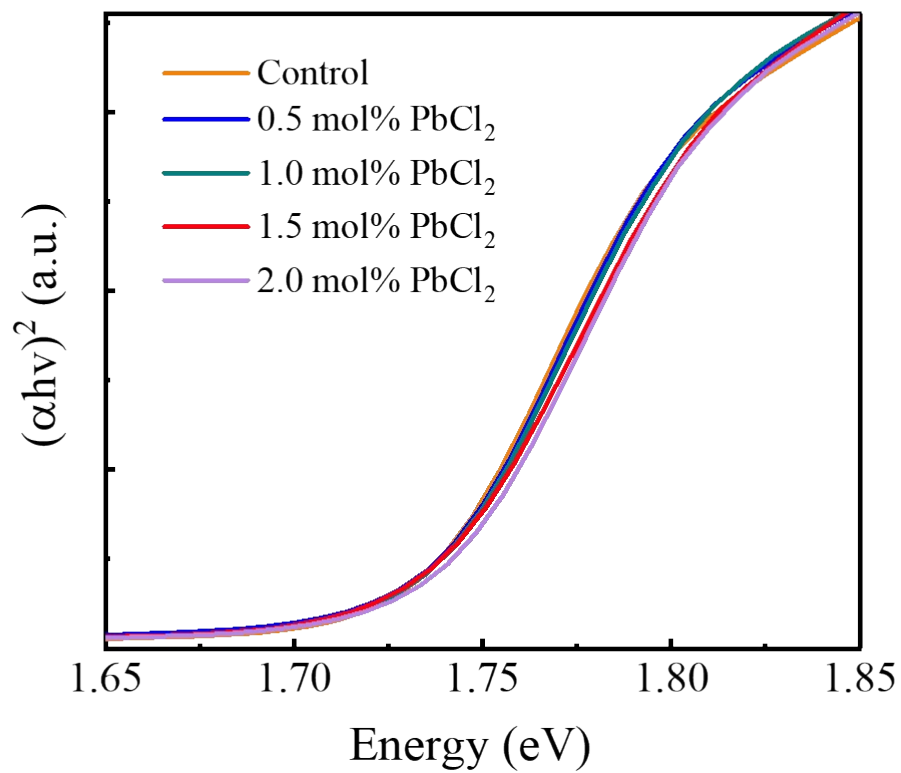

**Fig. S2** Tauc plots of wide- $E_g$  perovskite films with  $\text{PbCl}_2$  concentration changing from 0 to 2.0 mol%.

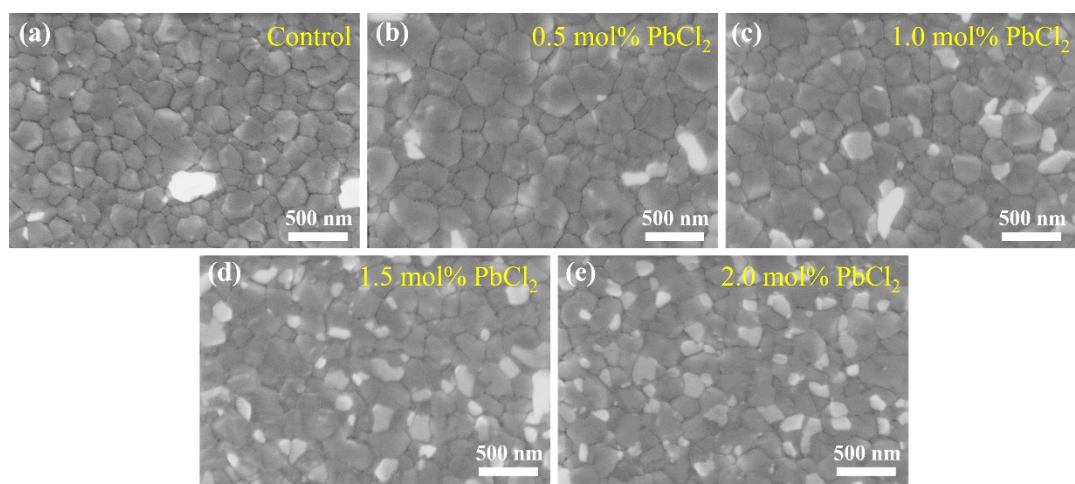

**Fig. S3** Top-view SEM images of wide- $E_g$  perovskite films treated with different concentrations of  $\text{PbCl}_2$ : (a) Control, (b) 0.5 mol%, (c) 1.0 mol%, (d) 1.5 mol%, and (e) 2.0 mol%.

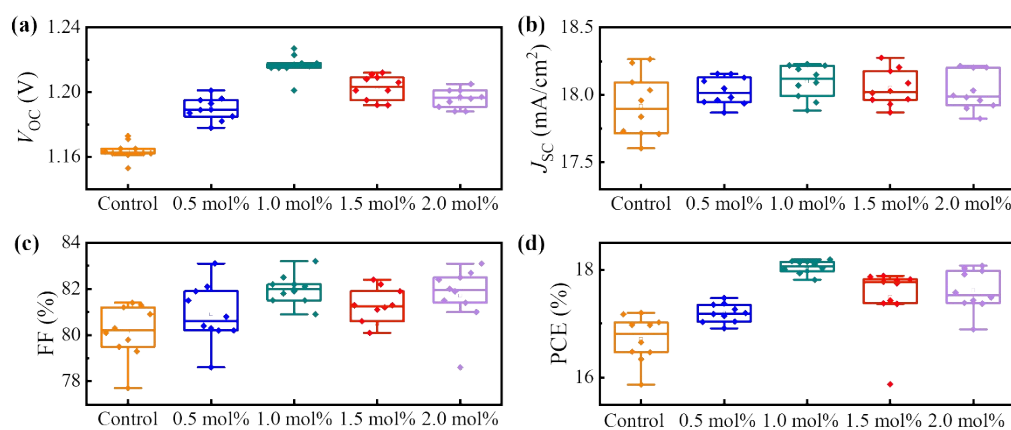

**Fig. S4** Statistical results of (a)  $V_{OC}$ , (b)  $J_{SC}$ , (c) FF, and (d) PCE of wide- $E_g$  PSCs with  $\text{PbCl}_2$  concentration changing from 0 to 2.0 mol%. These results are calculated from 50 individual devices.

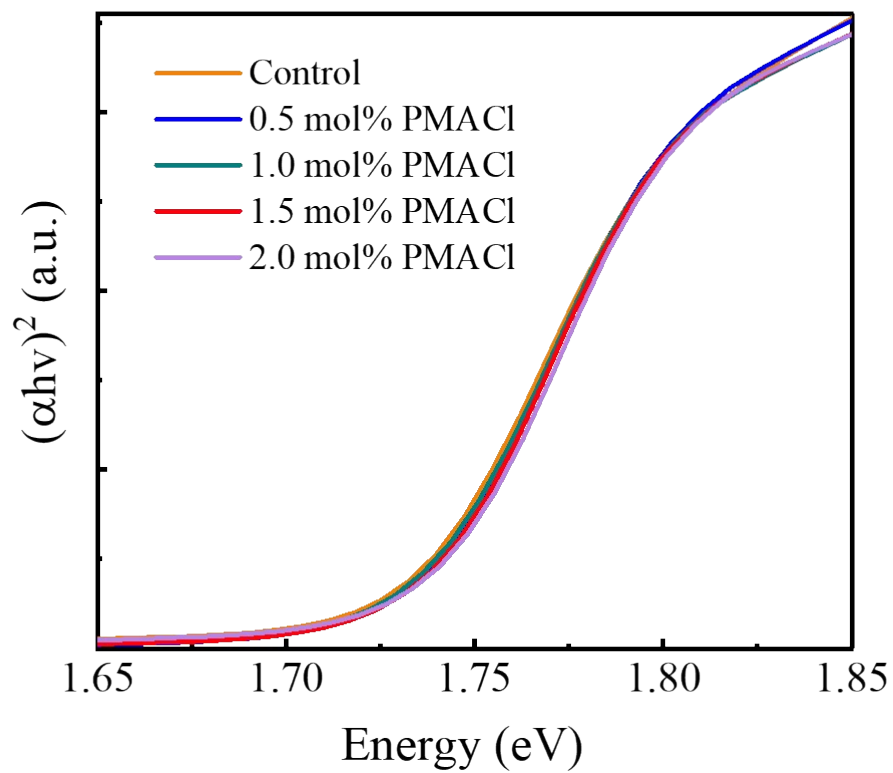

**Fig. S5** Tauc plots of wide- $E_g$  perovskite films with PMACl concentration changing from 0 to 2.0 mol%.

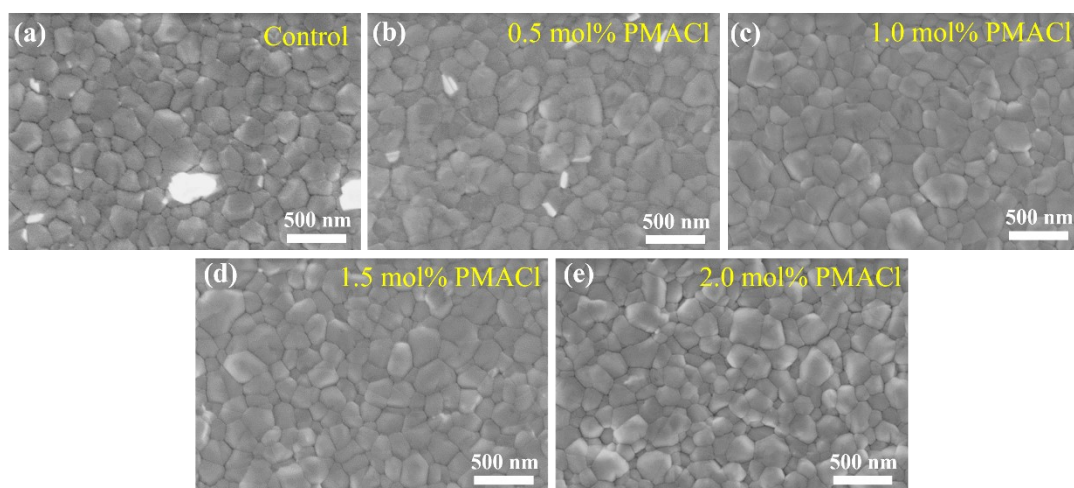

**Fig. S6** Top-view SEM images of wide- $E_g$  perovskite films treated with different concentrations of PMACl: (a) Control, (b) 0.5 mol%, (c) 1.0 mol%, (d) 1.5 mol%, and (e) 2.0 mol%.

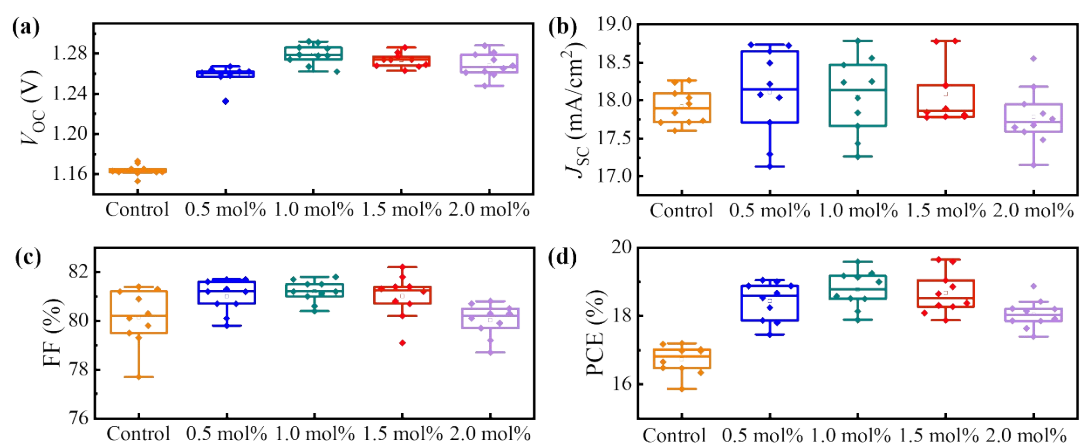

**Fig. S7** Statistic results of (a)  $V_{OC}$ , (b)  $J_{SC}$ , (c) FF, and (d) PCE of wide- $E_g$  PSCs with PMACl concentration changing from 0 to 2.0 mol%. These results were calculated from 50 individual devices.

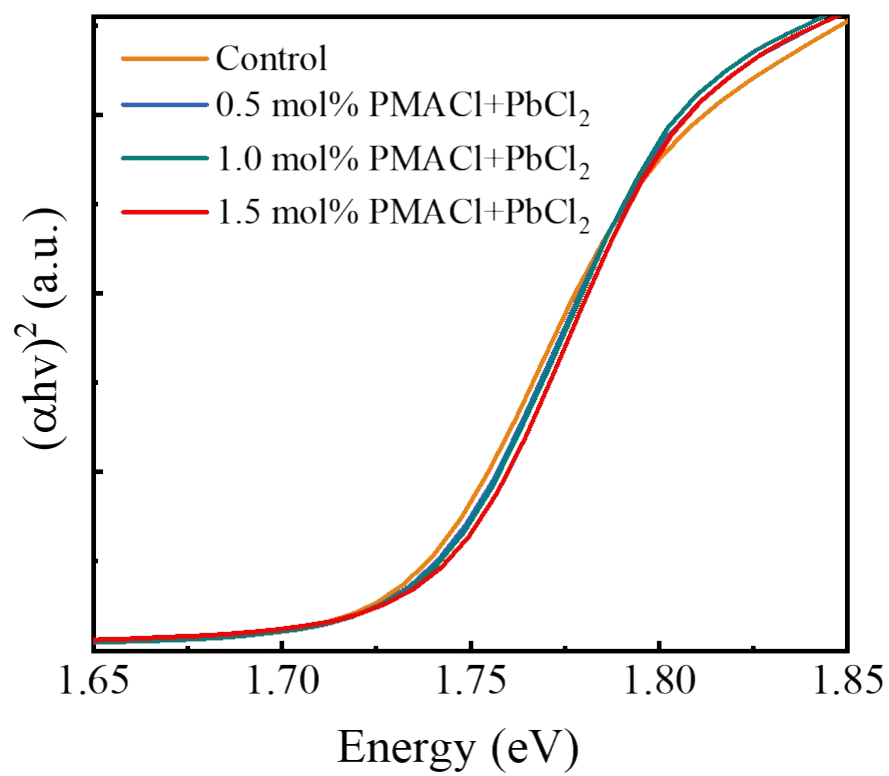

**Fig. S8** Tauc plots of wide- $E_g$  perovskite films with different PbCl<sub>2</sub>+PMACl concentrations.

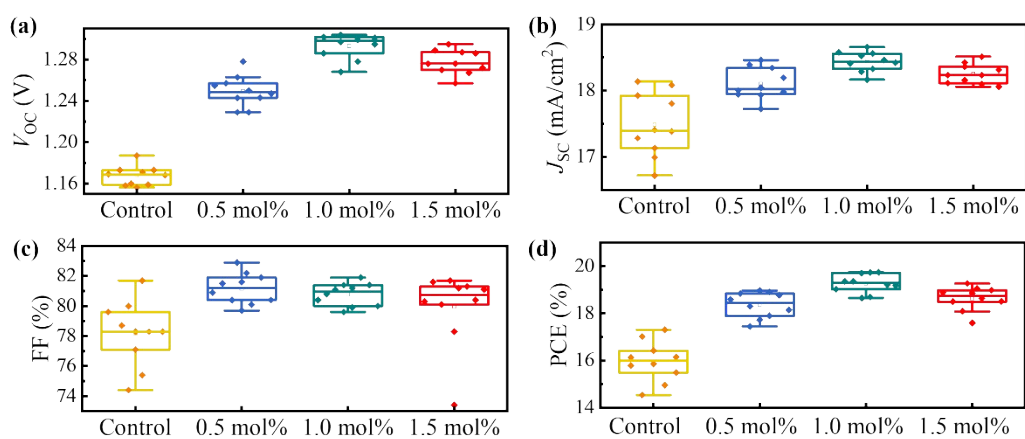

**Fig. S9** Statistic results of (a)  $V_{OC}$ , (b)  $J_{SC}$ , (c) FF, and (d) PCE of wide- $E_g$  PSCs with different  $\text{PbCl}_2$ +PMACl concentrations. These results were calculated from 40 individual devices.

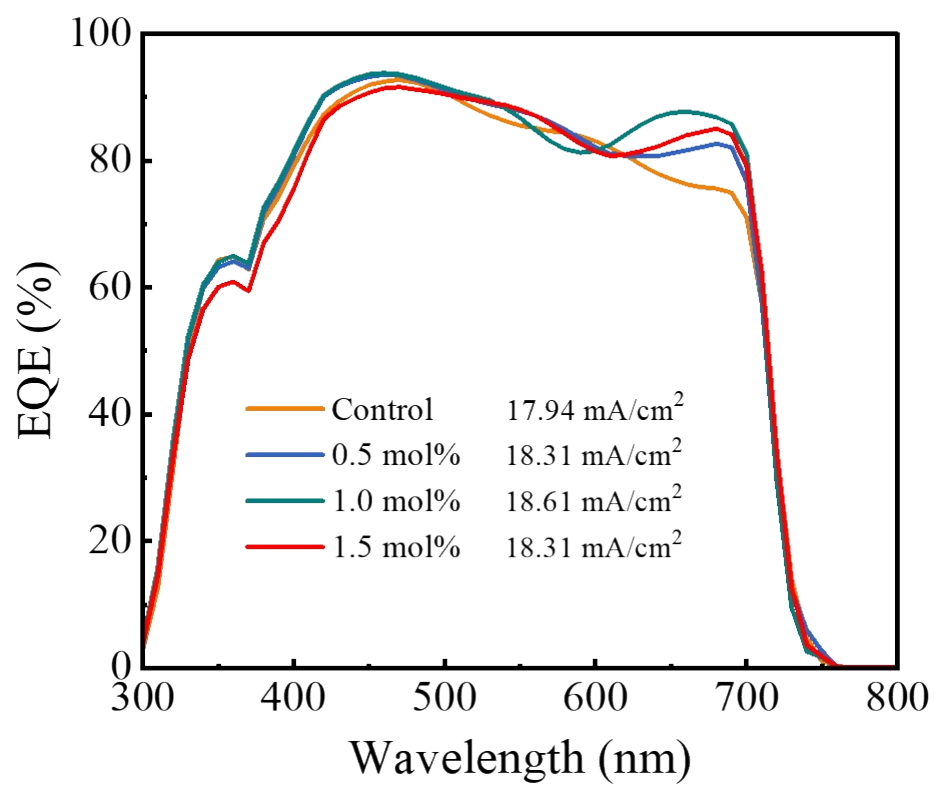

**Fig. S10** EQE plots of wide- $E_g$  PSCs with different PbCl<sub>2</sub>+PMACl concentrations (Control, 0.5 mol%, 1.0 mol%, and 1.5 mol%).

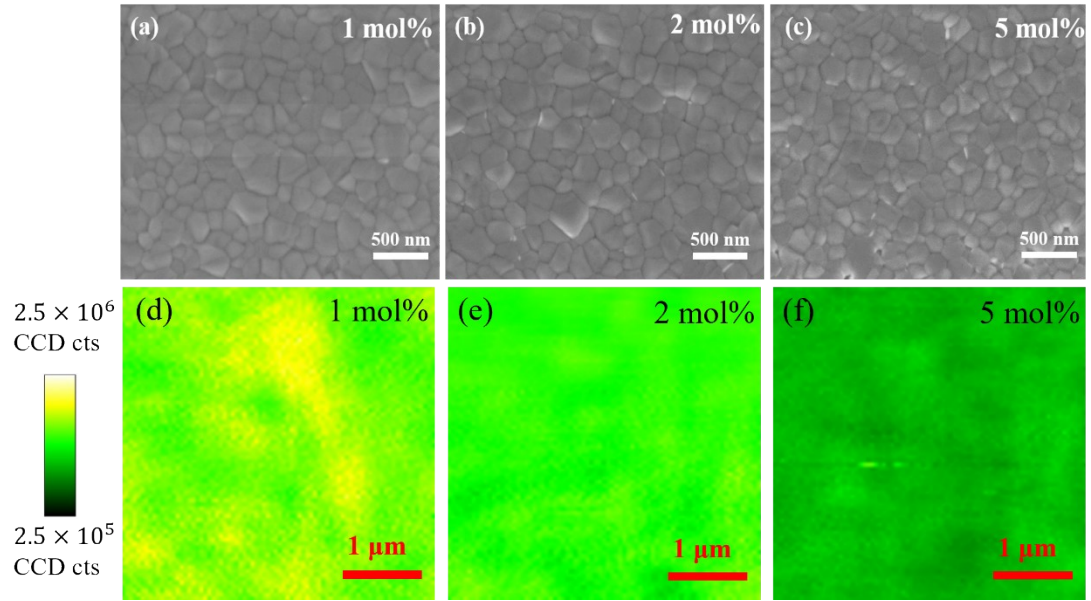

**Fig. S11** (a-c) Top-view SEM images and (d-f) PL mapping images of wide- $E_g$  perovskite films with high  $\text{PbCl}_2 + \text{PMACl}$  concentrations: (a, d) 1 mol%, (b, e) 2 mol%, and (c, f) 5 mol%.

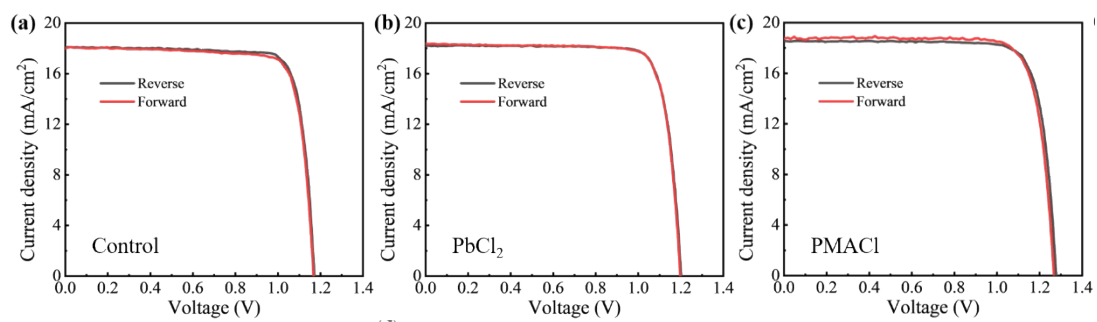

**Fig. S12**  $J$ - $V$  curves under reverse and forward voltage scans of the best performing (a) control, (b)  $\text{PbCl}_2$ , and (c) PMACl wide- $E_g$  PSCs.

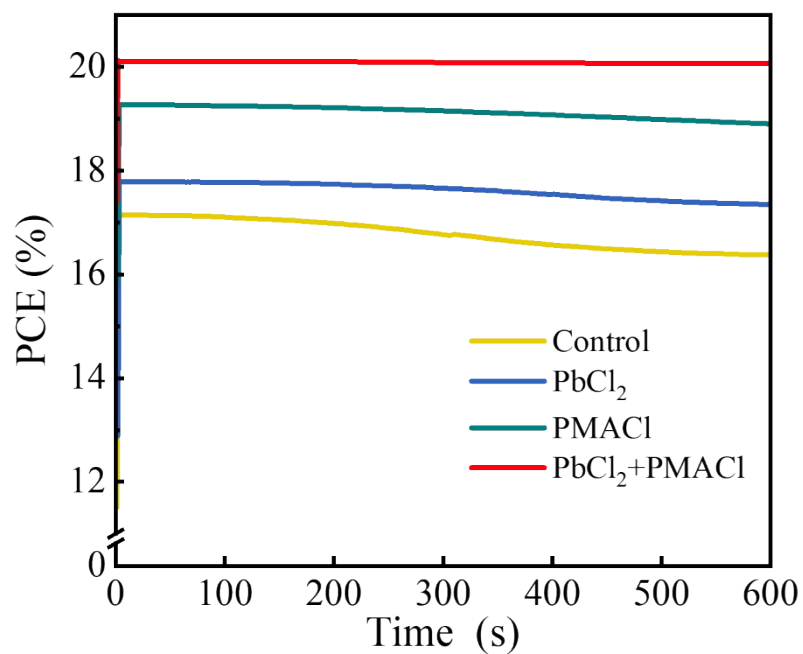

**Fig. S13** Power outputs of control, PbCl<sub>2</sub>, PMACl, and PbCl<sub>2</sub>+PMACl wide- $E_g$  PSCs measured by using MPP tracking. The unencapsulated cells were measured under AM 1.5G in the inert condition.

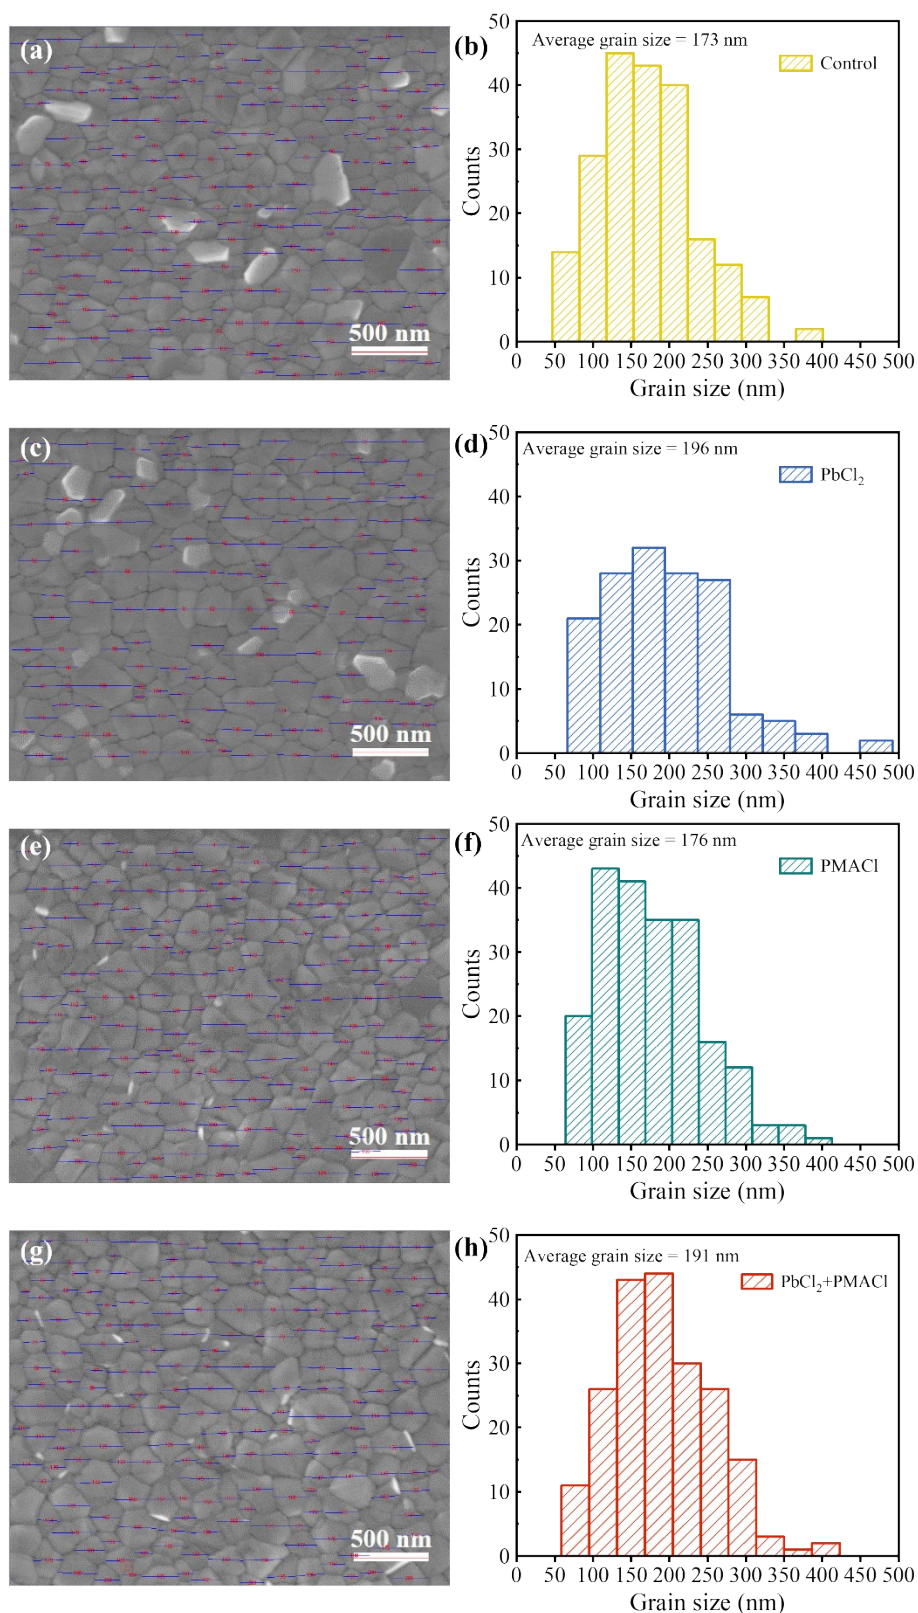

**Fig. S14** Statistics of grain size for perovskite films based on (a) control, (c)  $\text{PbCl}_2$ , (e) PMACl and (g)  $\text{PbCl}_2$ +PMACl, and the corresponding grain size distribution of perovskite films based on (b) control, (d)  $\text{PbCl}_2$ , (f) PMACl, and (h)  $\text{PbCl}_2$ +PMACl.

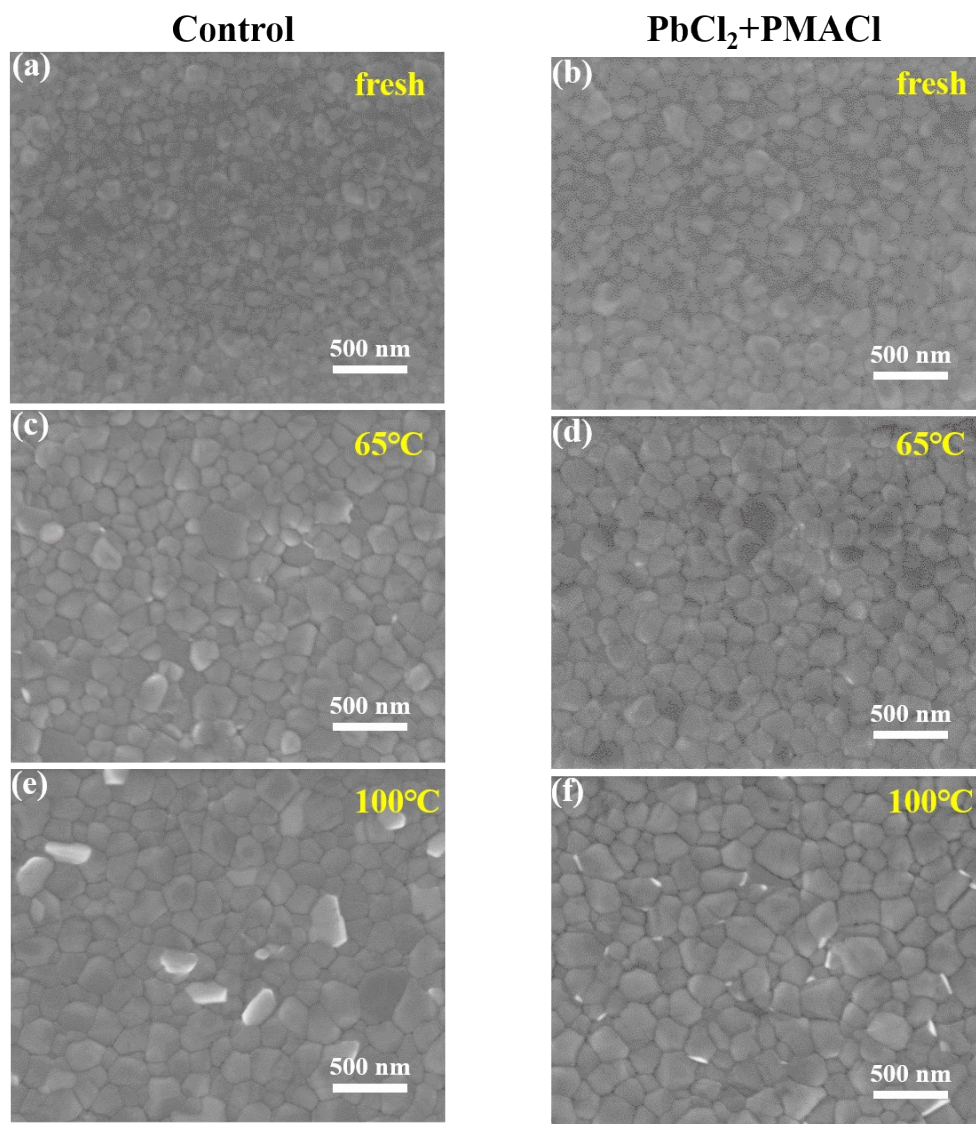

**Fig. S15** Top-view SEM images of control and  $\text{PbCl}_2$ +PMACl wide- $E_g$  perovskite films at different annealing temperature: (a, b) fresh, (c, d) 65 °C for 10 mins, (e, f) 100 °C for 10 mins.

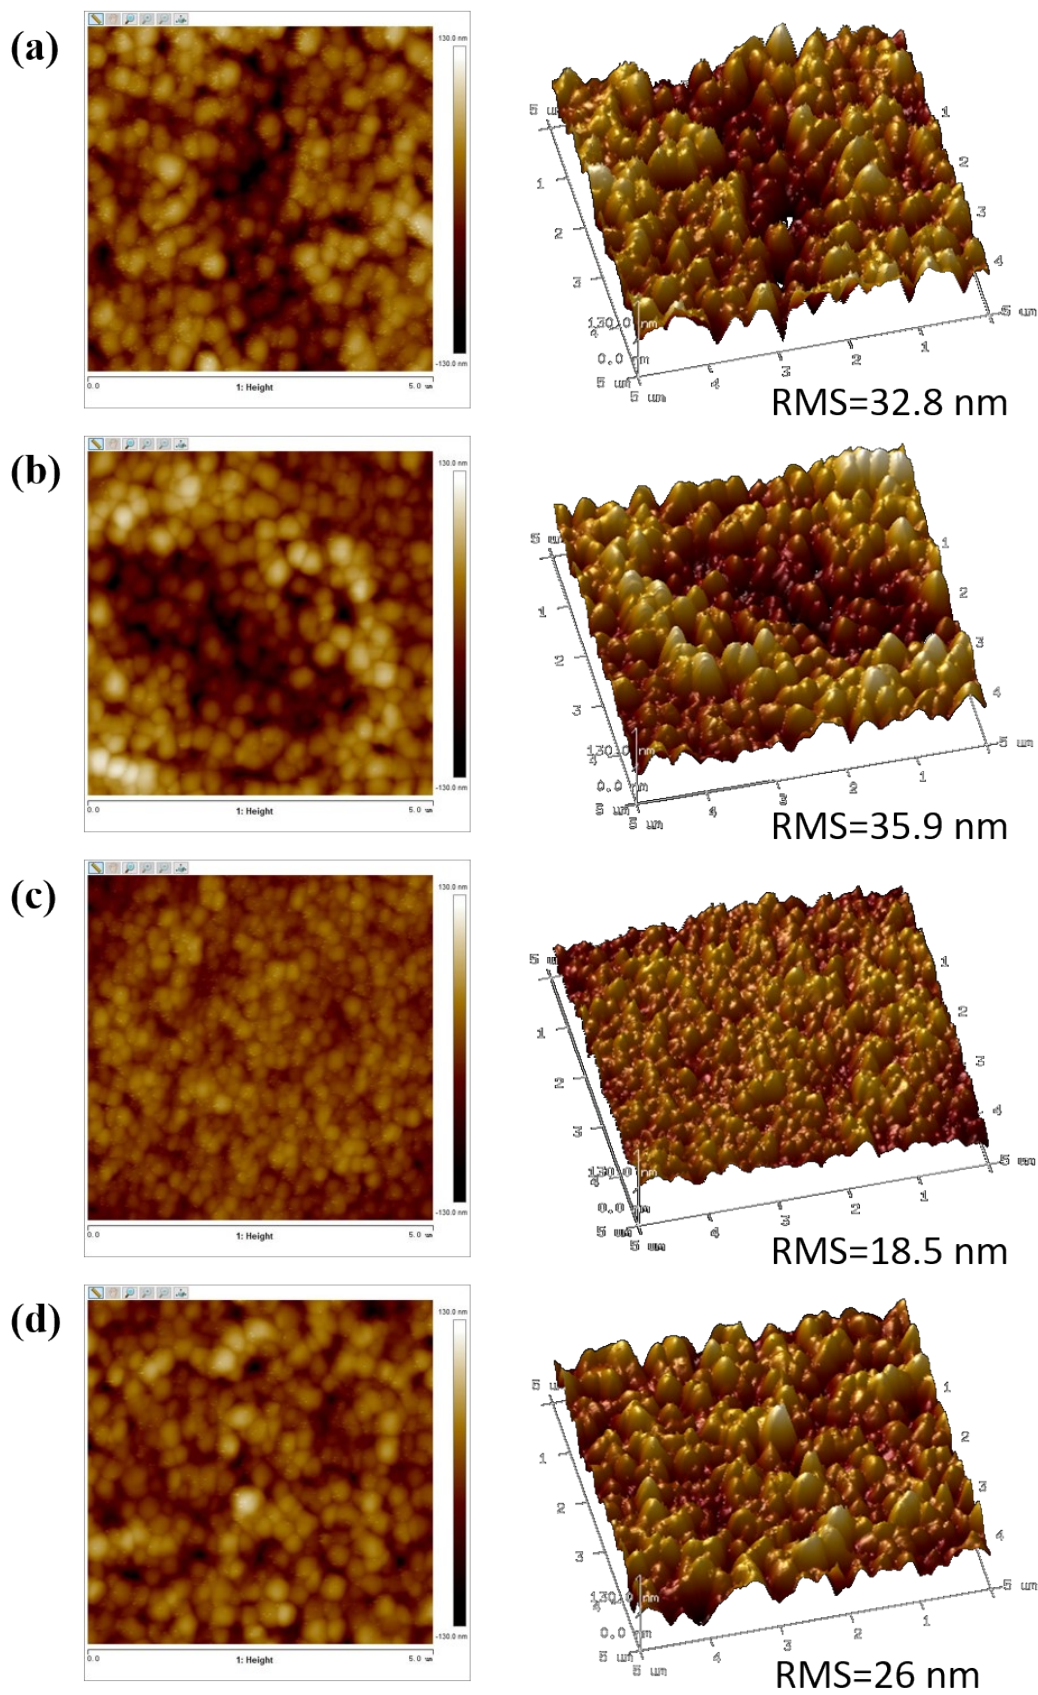

**Fig. S16** AFM images of (a) control, (b)  $\text{PbCl}_2$ , (c)  $\text{PMACl}$ , and (d)  $\text{PbCl}_2+\text{PMACl}$  wide- $E_g$  perovskite films.

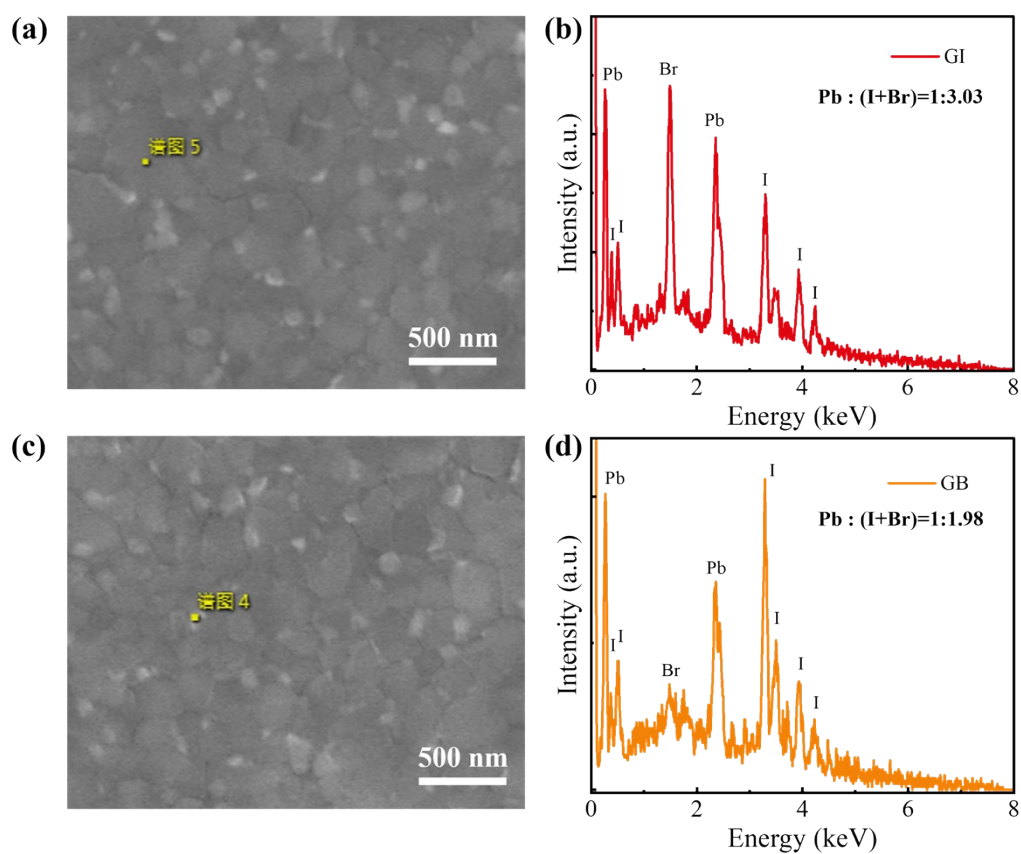

**Fig. S17** Top-view SEM images and corresponding EDS spectra of  $\text{PbCl}_2$  only wide- $E_g$  perovskite films taken from (a, b) a grain interior and (c, d) a bright part at the grain boundary.

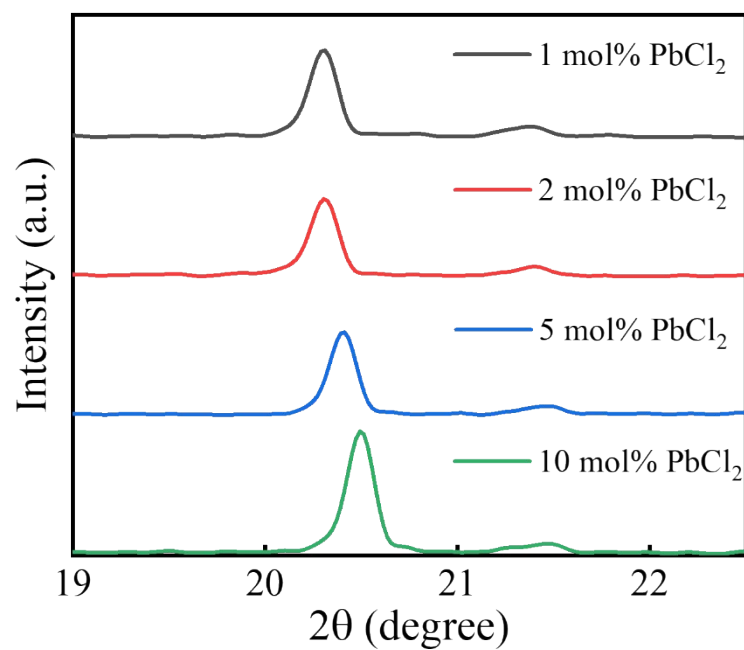

**Fig. S18** XRD patterns of wide- $E_g$  perovskite films treated with different concentrations of  $\text{PbCl}_2$ , where  $2\theta$  ranges from  $19^\circ$  to  $22.5^\circ$ .

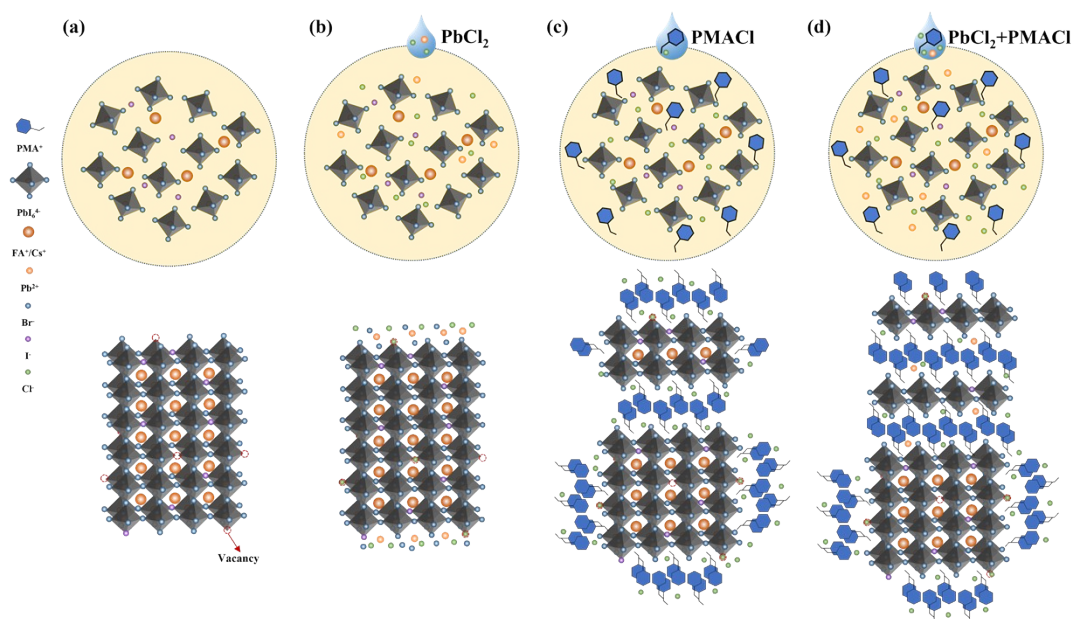

**Fig. S19** Schematic of perovskite films treated by (b)  $\text{PbCl}_2$ , (c) PMACl and (d)  $\text{PbCl}_2$ +PMACl, while (a) is the control film.

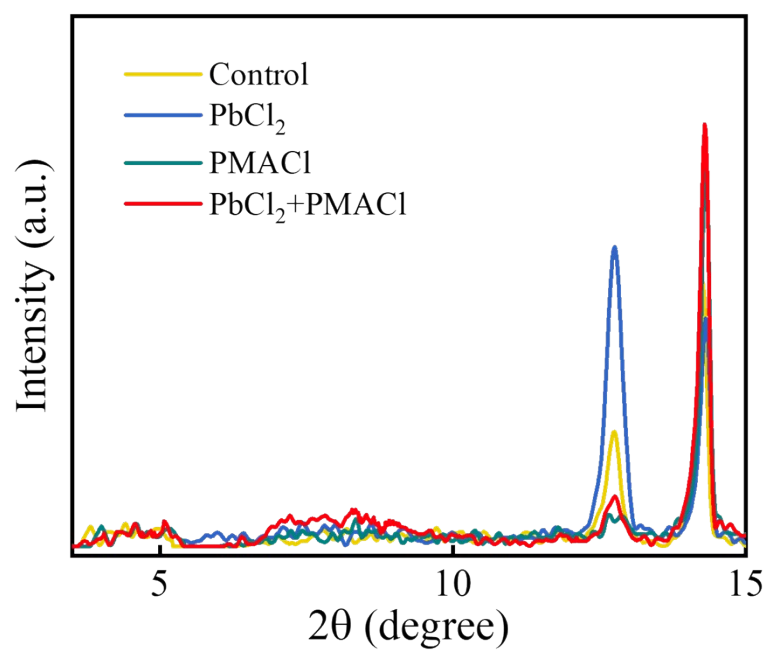

**Fig. S20** XRD patterns of control, PbCl<sub>2</sub>, PMACl, and PbCl<sub>2</sub>+PMACl treated perovskite films, where 2θ ranges from 3.5° to 15°.

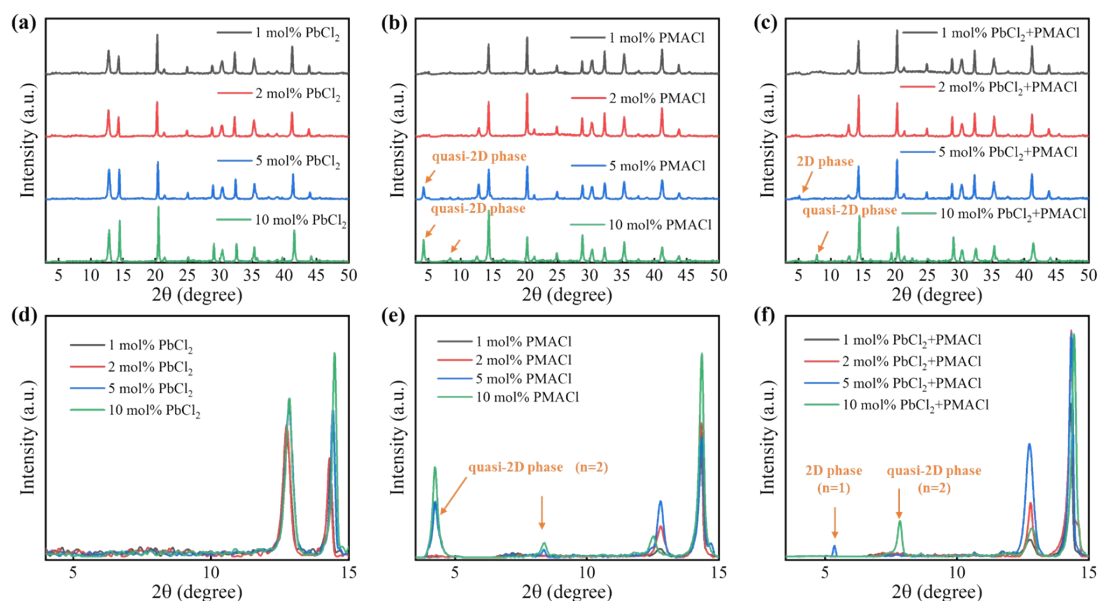

**Fig. S21** XRD patterns of wide- $E_g$  perovskite films treated with different concentrations of (a, d)  $\text{PbCl}_2$ , (b, e)  $\text{PMACl}$ , and (c, f)  $\text{PbCl}_2+\text{PMACl}$ . Full  $2\theta$  range in (a-c) is from  $3.5^\circ$  to  $50^\circ$ , and the range is narrowed from  $3.5^\circ$  to  $15^\circ$  in (d-f).

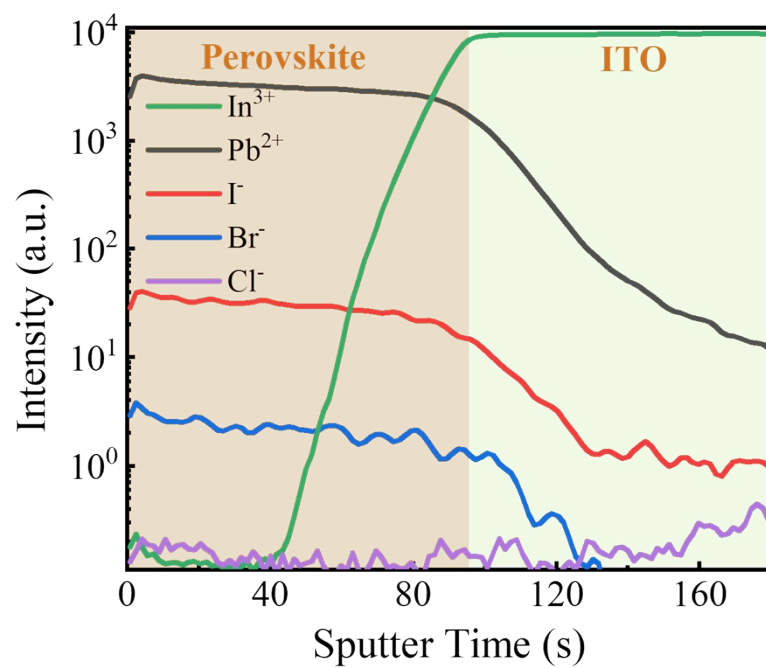

**Fig. S22** ToF-SIMS profiles of the control perovskite film. No Cl distribution can be found in the film.

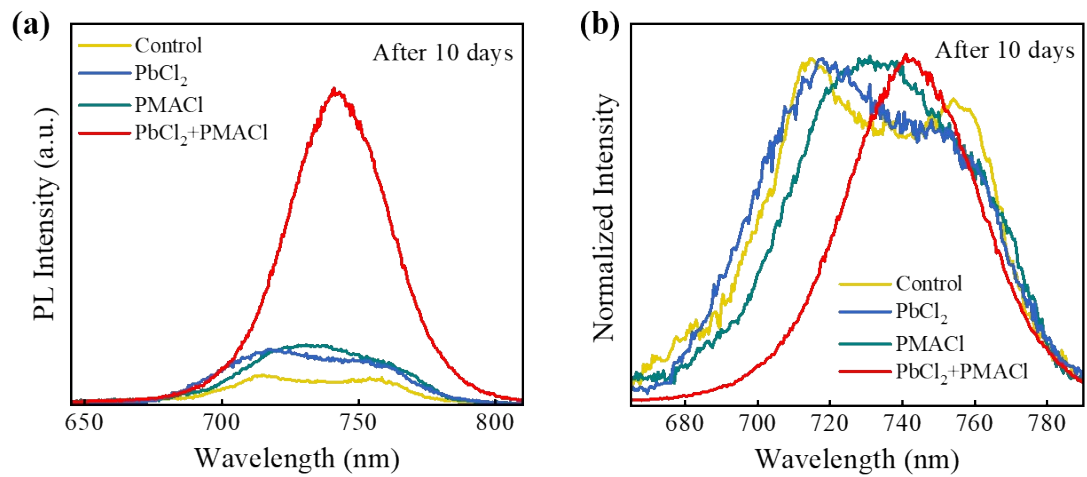

**Fig. S23** PL spectra of control,  $\text{PbCl}_2$ , PMACl and  $\text{PbCl}_2$ +PMACl treated perovskite films. These wide- $E_g$  samples have been aged for 10 days in inert condition. (a) Absolute PL intensity spectra, (b) normalized PL intensity spectra.

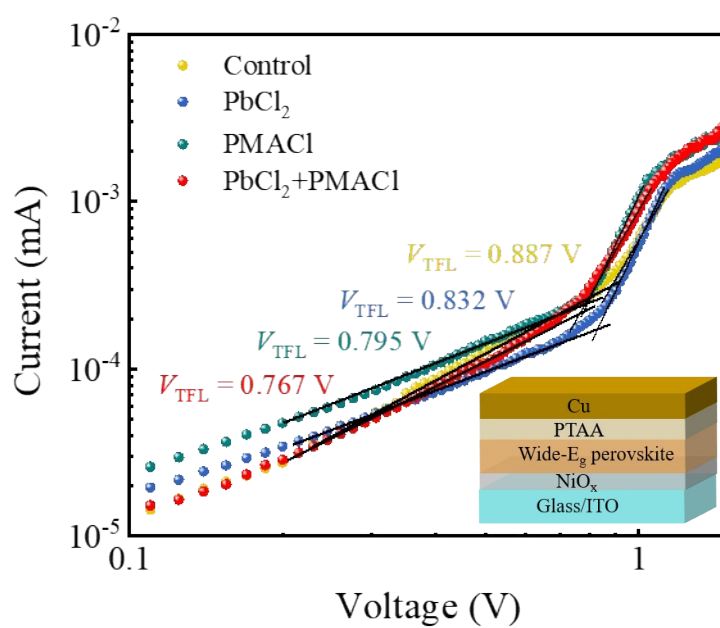

**Fig. S24** SCLC measurements of the hole-only devices with a structure of ITO/ $\text{NiO}_x$ /wide- $E_g$  perovskite/PTAA/Cu for different perovskite films (control,  $\text{PbCl}_2$ , PMACl, and  $\text{PbCl}_2 + \text{PMACl}$ ).

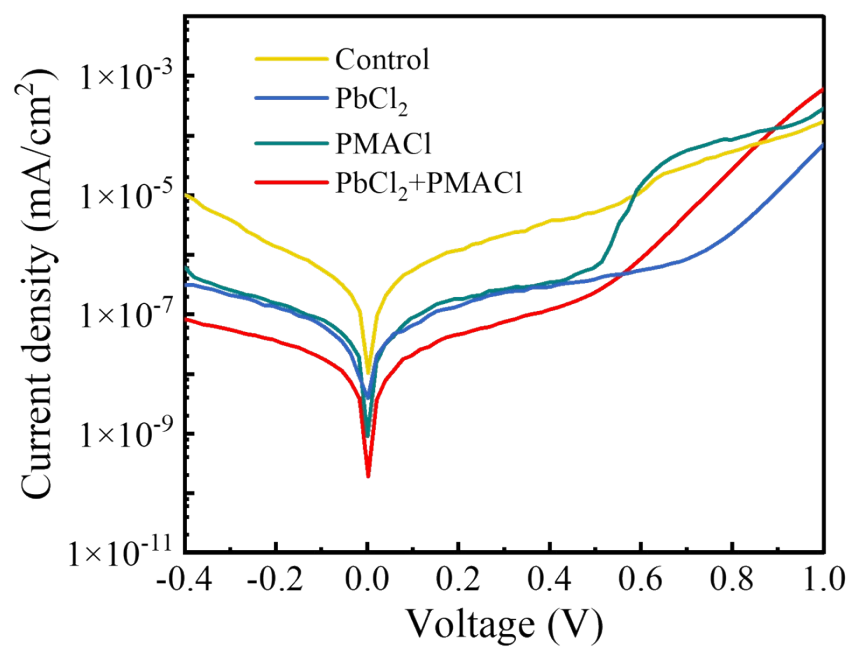

**Fig. S25** Dark  $J$ - $V$  curves of control,  $\text{PbCl}_2$ , PMACl, and  $\text{PbCl}_2 + \text{PMACl}$  PSCs.

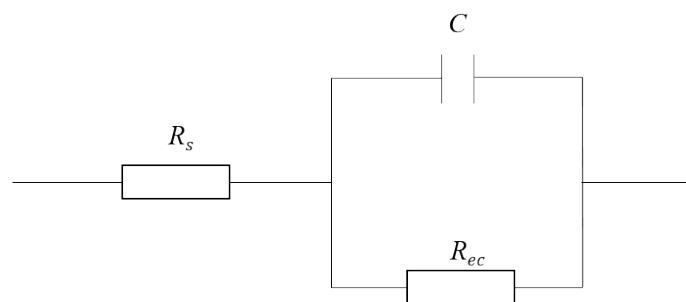

**Fig. S26** The equivalent circuit related to the Nyquist plots in Fig. 4d.

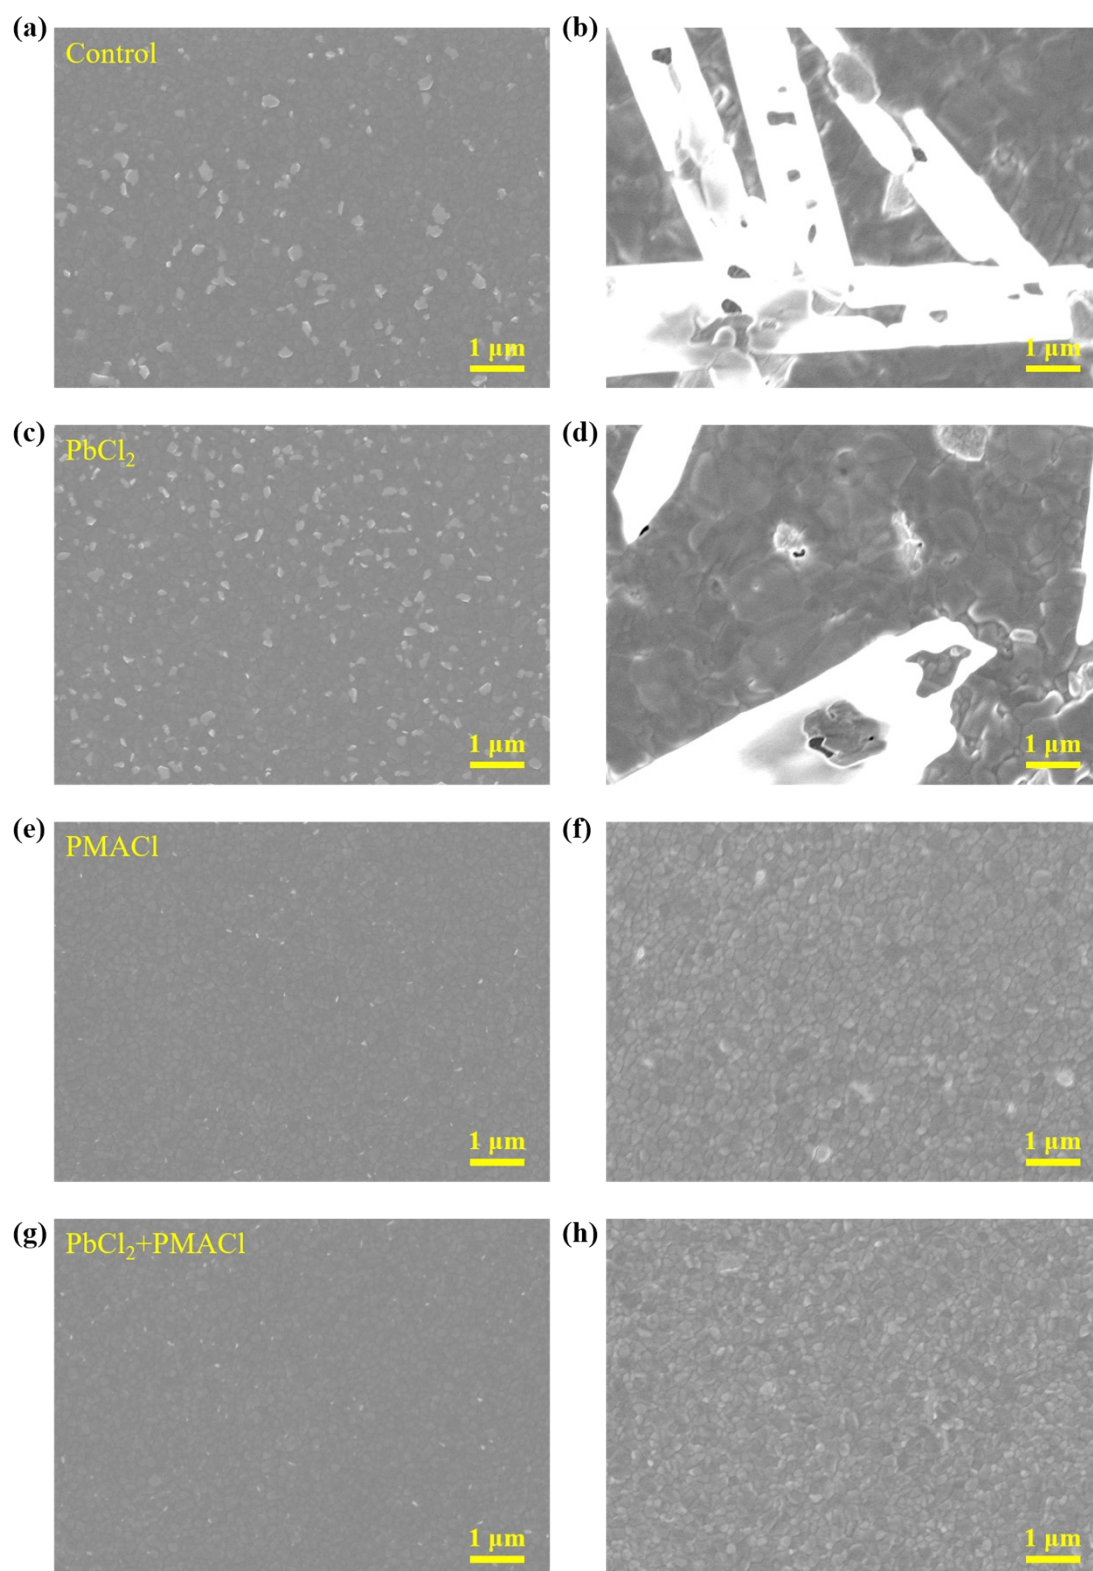

**Fig. S27** Top-view SEM images of (a, b) control, (c, d)  $\text{PbCl}_2$ , (e, f) PMACl, and (g, h)  $\text{PbCl}_2 + \text{PMACl}$  perovskite films. (a), (c), (e), (g) are fresh films, (b), (d), (f), (h) are perovskite films for 180 days under ambient conditions.

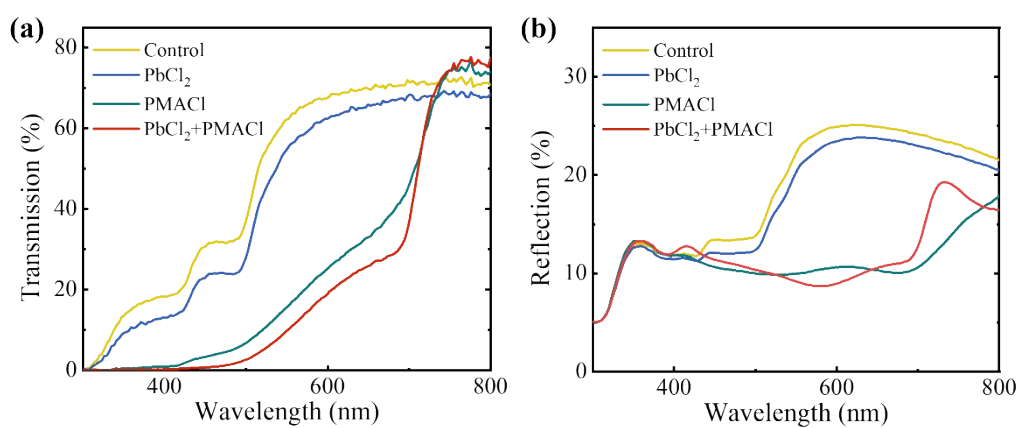

**Fig. S28** (a) Transmission and (b) reflection spectra of control,  $\text{PbCl}_2$ , PMACl and  $\text{PbCl}_2 + \text{PMACl}$  perovskite films exposed in air for 90 days.

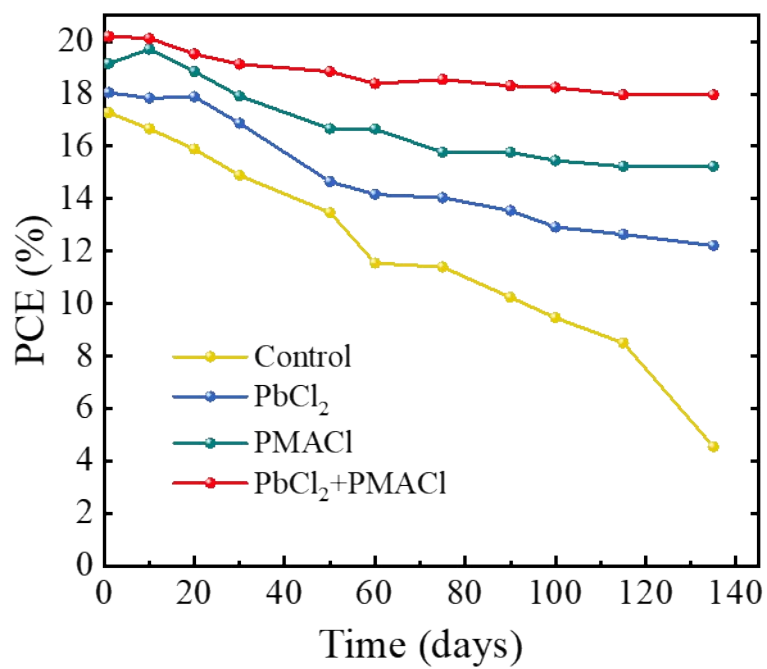

**Fig. S29** PCE evolution versus time of PSCs measured in a glovebox for 135 days.

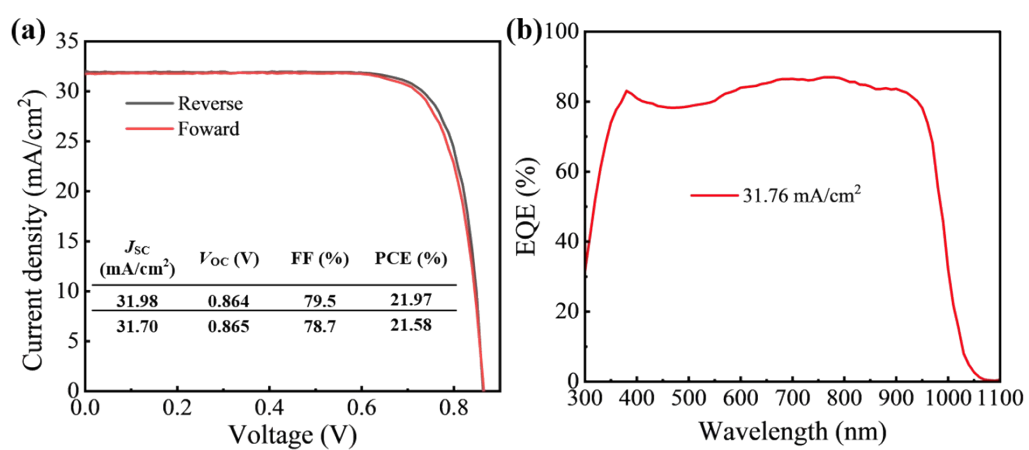

**Fig. S30** (a)  $J$ - $V$  curves under reverse and forward voltage scans, and (b) EQE spectrum of one single-junction low- $E_g$  PSC.

**Table S1.** Summary on photovoltaic parameters of wide- $E_g$  PSCs with different  $\text{PbCl}_2$  concentration under  $100 \text{ mW/cm}^2$  AM 1.5G illumination measured under reverse voltage scan.

| Sample   | PCE (%)          | $V_{\text{OC}}$ (V) | $J_{\text{SC}}$ ( $\text{mA/cm}^2$ ) | FF (%)         |
|----------|------------------|---------------------|--------------------------------------|----------------|
| Control  | $16.71 \pm 0.85$ | $1.164 \pm 0.011$   | $17.92 \pm 0.35$                     | $80.2 \pm 2.5$ |
| 0.5 mol% | $17.19 \pm 0.28$ | $1.190 \pm 0.012$   | $18.03 \pm 0.16$                     | $80.9 \pm 2.3$ |
| 1.0 mol% | $18.05 \pm 0.23$ | $1.217 \pm 0.016$   | $18.10 \pm 0.21$                     | $82.0 \pm 1.2$ |
| 1.5 mol% | $17.49 \pm 1.62$ | $1.203 \pm 0.011$   | $18.05 \pm 0.22$                     | $80.5 \pm 7.6$ |
| 2.0 mol% | $17.61 \pm 0.72$ | $1.196 \pm 0.009$   | $18.02 \pm 0.20$                     | $81.7 \pm 3.1$ |

**Table S2.** Summary on photovoltaic parameters of wide- $E_g$  PSCs with different PMACl concentration under 100 mW/cm<sup>2</sup> AM 1.5G illumination measured under reverse voltage scan.

| Sample   | PCE (%)      | $V_{oc}$ (V)  | $J_{sc}$ (mA/cm <sup>2</sup> ) | FF (%)     |
|----------|--------------|---------------|--------------------------------|------------|
| Control  | 16.71 ± 0.85 | 1.164 ± 0.011 | 17.92 ± 0.35                   | 80.2 ± 2.5 |
| 0.5 mol% | 18.44 ± 0.98 | 1.256 ± 0.024 | 18.11 ± 0.98                   | 81.0 ± 1.2 |
| 1.0 mol% | 18.78 ± 0.98 | 1.280 ± 0.017 | 18.05 ± 0.79                   | 81.2 ± 0.8 |
| 1.5 mol% | 18.67 ± 0.98 | 1.273 ± 0.013 | 18.09 ± 0.70                   | 81.0 ± 1.9 |
| 2.0 mol% | 18.05 ± 0.82 | 1.269 ± 0.021 | 17.78 ± 0.77                   | 80.0 ± 1.3 |

**Table S3.** Summary on photovoltaic parameters of wide- $E_g$  PSCs with different  $\text{PbCl}_2$ +PMACl concentration under 100  $\text{mW/cm}^2$  AM 1.5G illumination measured under reverse voltage scan.

| Sample   | PCE (%)          | $V_{oc}$ (V)      | $J_{sc}$ ( $\text{mA/cm}^2$ ) | FF (%)         |
|----------|------------------|-------------------|-------------------------------|----------------|
| Control  | $15.97 \pm 1.43$ | $1.167 \pm 0.020$ | $17.49 \pm 0.77$              | $78.2 \pm 3.8$ |
| 0.5 mol% | $18.36 \pm 0.91$ | $1.249 \pm 0.029$ | $18.10 \pm 0.38$              | $81.2 \pm 1.7$ |
| 1.0 mol% | $19.26 \pm 0.61$ | $1.293 \pm 0.025$ | $18.44 \pm 0.27$              | $80.8 \pm 1.2$ |
| 1.5 mol% | $18.76 \pm 0.67$ | $1.278 \pm 0.021$ | $18.25 \pm 0.26$              | $80.4 \pm 2.1$ |

**Table S4.** Summary on photovoltaic parameters of wide- $E_g$  PSCs with different additives under 100 mW/cm<sup>2</sup> AM 1.5G illumination measured under reverse and forward voltage scans.

| Sample                       | Direction | PCE (%) | $V_{oc}$ (V) | $J_{sc}$ (mA/cm <sup>2</sup> ) | FF (%) |
|------------------------------|-----------|---------|--------------|--------------------------------|--------|
| Control                      | Reverse   | 17.38   | 1.172        | 18.14                          | 81.7   |
|                              | Forward   | 17.16   | 1.167        | 17.98                          | 81.7   |
| PbCl <sub>2</sub>            | Reverse   | 18.19   | 1.201        | 18.19                          | 83.2   |
|                              | Forward   | 18.14   | 1.197        | 18.37                          | 82.5   |
| PMACl                        | Reverse   | 19.22   | 1.278        | 18.55                          | 81.1   |
|                              | Forward   | 19.24   | 1.267        | 18.75                          | 81.0   |
| PbCl <sub>2</sub> +<br>PMACl | Reverse   | 20.22   | 1.312        | 18.89                          | 81.6   |
|                              | Forward   | 20.14   | 1.310        | 18.82                          | 81.7   |

**Table S5.** Summary on photovoltaic parameters of different additives treated wide- $E_g$  PSCs under 100 mW/cm<sup>2</sup> AM 1.5G illumination measured under reverse voltage scan.

| Sample                   | PCE (%)      | $V_{oc}$ (V)  | $J_{sc}$ (mA/cm <sup>2</sup> ) | FF (%)     |
|--------------------------|--------------|---------------|--------------------------------|------------|
| Control                  | 16.81 ± 0.57 | 1.167 ± 0.007 | 17.95 ± 0.40                   | 80.3 ± 1.4 |
| PbCl <sub>2</sub>        | 17.83 ± 0.91 | 1.207 ± 0.022 | 18.08 ± 0.26                   | 81.9 ± 1.3 |
| PMACl                    | 19.07 ± 0.51 | 1.280 ± 0.018 | 18.37 ± 0.56                   | 81.1 ± 0.8 |
| PbCl <sub>2</sub> +PMACl | 19.83 ± 0.53 | 1.301 ± 0.011 | 18.75 ± 0.30                   | 81.3 ± 1.2 |

**Table S6.** Photovoltaic performance metrics of state-of-the-art inverted wide- $E_g$  PSCs with low  $V_{OC}$ -deficits as shown in Fig. 1f.

| Year        | Type         | $E_g$<br>(eV) | $V_{OC}$ -deficit<br>(V) | $V_{OC}$<br>(V) | FF<br>(%)   | $J_{SC}$<br>(mA/cm <sup>2</sup> ) | PCE<br>(%)   | Ref.             |
|-------------|--------------|---------------|--------------------------|-----------------|-------------|-----------------------------------|--------------|------------------|
| 2016        | p-i-n        | 1.75          | 0.54                     | 1.21            | 77.9        | 15.80                             | 14.90        | <sup>1</sup>     |
| 2016        | p-i-n        | 1.73          | 0.69                     | 1.04            | 78.0        | 15.52                             | 12.59        | <sup>2</sup>     |
| 2016        | p-i-n        | 1.72          | 0.56                     | 1.16            | 78.2        | 18.3                              | 16.6         | <sup>1</sup>     |
| 2017        | p-i-n        | 1.71          | 0.5                      | 1.21            | 77.5        | 19.7                              | 18.5         | <sup>3</sup>     |
| 2017        | p-i-n        | 1.72          | 0.57                     | 1.15            | 77.0        | 19.40                             | 17.20        | <sup>4</sup>     |
| 2018        | p-i-n        | 1.75          | 0.53                     | 1.22            | 73.2        | 16.30                             | 14.60        | <sup>5</sup>     |
| 2018        | p-i-n        | 1.68          | 0.58                     | 1.10            | 82.0        | 19.30                             | 17.50        | <sup>6</sup>     |
| 2018        | p-i-n        | 1.75          | 0.58                     | 1.17            | 80.0        | 17.50                             | 16.30        | <sup>6</sup>     |
| 2018        | p-i-n        | 1.71          | 0.47                     | 1.24            | 77.0        | 17.45                             | 16.74        | <sup>7</sup>     |
| 2019        | p-i-n        | 1.77          | 0.554                    | 1.216           | 79.7        | 17.00                             | 16.50        | <sup>8</sup>     |
| 2019        | p-i-n        | 1.75          | 0.51                     | 1.24            | 81.9        | 17.92                             | 18.19        | <sup>9</sup>     |
| 2020        | p-i-n        | 1.76          | 0.555                    | 1.205           | 81.1        | 18.55                             | 18.12        | <sup>10</sup>    |
| 2020        | p-i-n        | 1.75          | 0.49                     | 1.26            | 80.0        | 18.12                             | 18.30        | <sup>11</sup>    |
| 2020        | p-i-n        | 1.77          | 0.564                    | 1.206           | 77.0        | 17.10                             | 15.90        | <sup>12</sup>    |
| 2020        | p-i-n        | 1.73          | 0.48                     | 1.25            | 78.9        | 19.48                             | 19.07        | <sup>13</sup>    |
| 2021        | p-i-n        | 1.70          | 0.61                     | 1.09            | 79.0        | 23.80                             | 20.20        | <sup>14</sup>    |
| 2021        | p-i-n        | 1.68          | 0.49                     | 1.19            | 81.8        | 20.94                             | 20.31        | <sup>15</sup>    |
| 2022        | p-i-n        | 1.75          | 0.511                    | 1.239           | 81.6        | 18.20                             | 18.40        | <sup>16</sup>    |
| 2022        | p-i-n        | 1.79          | 0.46                     | 1.33            | 83.9        | 17.3                              | 19.3         | <sup>17</sup>    |
| <b>2022</b> | <b>p-i-n</b> | <b>1.73</b>   | <b>0.418</b>             | <b>1.312</b>    | <b>81.6</b> | <b>18.89</b>                      | <b>20.22</b> | <b>this work</b> |

**Table S7.** TRPL parameters of perovskite films with different additives.

| <div>Parameter<br/>Sample</div> | $\tau_1$<br>(ns) | $A$   | $\tau_2$<br>(ns) | $B$   | $\tau_{ave}$<br>(ns) |
|---------------------------------|------------------|-------|------------------|-------|----------------------|
| Control                         | 28.30            | 79.44 | 95.91            | 20.56 | 59.89                |
| PbCl <sub>2</sub>               | 26.42            | 69.37 | 90.70            | 30.63 | 65.15                |
| PMACl                           | 25.90            | 69.85 | 135.60           | 30.15 | 101.94               |
| PbCl <sub>2</sub> +PMACl        | 68.92            | 56.23 | 257.20           | 43.77 | 208.98               |

The average lifetime ( $\tau$ ) was calculated using the following equation

$$\tau_{ave} = \frac{A\tau_1^2 + B\tau_2^2}{A\tau_1 + B\tau_2}$$

## Supplementary References

- [1] M. Hu, C. Bi, Y. Yuan, Y. Bai, J. Huang, *Adv. Sci.* **2016**, 3, 1500301.
- [2] Z. Yang, A. Rajagopal, S. B. Jo, C. C. Chueh, S. Williams, C. C. Huang, J. K. Katahara, H. W. Hillhouse, A. K. Y. Jen, *Nano Lett.* **2016**, 16, 7739.
- [3] Y. Lin, B. Chen, F. Zhao, X. Zheng, Y. Deng, Y. Shao, Y. Fang, Y. Bai, C. Wang, J. Huang, *Adv. Mater.* **2017**, 29, 1700607
- [4] X. Zheng, B. Chen, J. Dai, Y. Fang, Y. Bai, Y. Lin, H. Wei, X. C. Zeng, J. Huang, *Nat. Energy* **2017**, 2, 17102.
- [5] R. J. Stoddard, A. Rajagopal, R. L. Palmer, I. L. Braly, A. K. Y. Jen, H. W. Hillhouse, *ACS Energy Lett.* **2018**, 3, 1261.
- [6] K. A. Bush, K. Frohna, R. Prasanna, R. E. Beal, T. Leijtens, S. A. Swifter, M. D. McGehee, *ACS Energy Lett.* **2018**, 3, 428.
- [7] D. B. Khadka, Y. Shirai, M. Yanagida, T. Noda, K. Miyano, *ACS Appl. Mater. Interfaces* **2018**, 10, 22074.
- [8] R. Lin, K. Xiao, Z. Qin, Q. Han, C. Zhang, M. Wei, M. I. Saidaminov, Y. Gao, J. Xu, M. Xiao, A. Li, J. Zhu, E. H. Sargent, H. Tan, *Nat. Energy* **2019**, 4, 864.
- [9] C. Chen, Z. Song, C. Xiao, D. Zhao, N. Shrestha, C. Li, G. Yang, F. Yao, X. Zheng, R. J. Ellingson, C. S. Jiang, M. Al-Jassim, K. Zhu, G. Fang, Y. Yan, *Nano Energy* **2019**, 61, 141.
- [10] Y. Chen, W. Tang, Y. Wu, R. Yuan, J. Yang, W. Shan, S. Zhang, W. H. Zhang, *Solar RRL* **2020**, 4, 2000344.
- [11] Z. Li, J. Zhang, S. Wu, X. Deng, F. Li, D. Liu, C. C. Lee, F. Lin, D. Lei, C. C. Chueh, Z. Zhu, A. K. Y. Jen, *Nano Energy* **2020**, 78, 105377.
- [12] K. Xiao, R. Lin, Q. Han, Y. Hou, Z. Qin, H. T. Nguyen, J. Wen, M. Wei, V. Yeddu, M. I. Saidaminov, Y. Gao, X. Luo, Y. Wang, H. Gao, C. Zhang, J. Xu, J. Zhu, E. H. Sargent, H. Tan, *Nat. Energy* **2020**, 5, 870.
- [13] C. Chen, Z. Song, C. Xiao, R. A. Awni, C. Yao, N. Shrestha, C. Li, S. S. Bista, Y. Zhang, L. Chen, R. J. Ellingson, C.-S. Jiang, M. Al-Jassim, G. Fang, Y. Yan, *ACS Energy Lett.* **2020**, 5, 2560.
- [14] F. Sadegh, S. Akin, M. Moghadam, R. Keshavarzi, V. Mirkhani, M. A. Ruiz-Preciado, E. Akman, H. Zhang, M. Amini, S. Tangestaninejad, I. Mohammadpoor-Baltork, M. Graetzel, A. Hagfeldt, W. Tress, *Adv. Funct. Mater.* **2021**, 31, 2102237.
- [15] C. Chen, J. Liang, J. Zhang, X. Liu, X. Yin, H. Cui, H. Wang, C. Wang, Z. Li, J. Gong, Q. Lin, W. Ke, C. Tao, B. Da, Z. Ding, X. Xiao, G. Fang, *Nano Energy* **2021**, 90, 106608.
- [16] L. Li, Y. Wang, X. Wang, R. Lin, X. Luo, Z. Liu, K. Zhou, S. Xiong, Q. Bao, G. Chen, Y. Tian, Y. Deng, K. Xiao, J. Wu, M. I. Saidaminov, H. Lin, C. Ma, Z. Zhao, Y. Wu, L. Zhang, H. Tan, *Nat. Energy* **2022**, 7, 708.
- [17] H. Chen, A. Maxwell, C. Li, S. Teale, B. Chen, T. Zhu, E. Ugur, G. Harrison, L. Grater, J. Wang, Z. Wang, L. Zeng, S. M. Park, L. Chen, P. Serles, R. A. Awni, B. Subedi, X. Zheng, C. Xiao, N. J. Podraza, T. Filleter, C. Liu, Y. Yang, J. M. Luther, S. De Wolf, M. G. Kanatzidis, Y. Yan and E. H. Sargent, *Nature*, **2022**, 611, 278.
